# Supplementary material for: In-Silico Investigation of Effects of Single-Nucleotide Polymorphisms in PCOS-Associated CYP11A1 Gene on Mutated Proteins
Source: MDPI journal article supplement (doi:10.3390/genes13071231), 2022-07-12
Supplement: s1 [file s1]

### Case 1

M L A K G L P P R S V L V K G C Q T F L S A P R E G L G R L R V P T G E G A G I  
S T R S P R P F N E I P S P G D N G W L N L Y H F W R E T G T H K V H L H H V Q  
N F Q K M A R F T G R S S A T W S R F M S S T L K M W P F S L S P R A P T Q N D  
S S S R P G S P I T S I T R D P

### Case 2

M L A K G L S P R S V L V K G C Q T F M S A P R E G L G R L R V P T G E G A G T  
F T R S P R P F N E I P S P G D N G W V K L Y H F W R E T G T H K V H L H H I Q  
N L Q K Y G P I Y R K K L S N V E S V Y V I D P E N V A L L F K S E G P N P E R  
F L I P P W V A Y H Q Y Y Q R P I G V L L K K T A A W R K D R V A L N Q E V M A  
P G A T K N F L P L L D A V S R D F V S V P H R R I K K A G S G N Y S G D I S D  
D L F R F A F K S I T N V I F G E R Q G M L E E V V N P E A Q R F I D A I Y Q M F  
H T S V P M L N L P P D L F R L F R T K T W K D H V A A W D V I F S K A D I Y T  
Q N F Y W E L R Q K G S V H H D Y R G I L Y R L L G D S K M S F E D I K A N V T  
E M L A G G V D T T S M T L Q W H L Y E M A R N L K V Q D M L R A E V L A A R H  
Q A Q G D M A T M L Q L V P L L K A S I K E T L R L H P I S V T L Q R Y L V N D  
L V L R D Y M I P A K T L V Q V A I Y A L G R E P T F F F D P E N F D P T R W L  
S K D K N I T Y F R N L G F G W G V R Q C L G R R I A E L E M T I F L I N M L E  
N F R V E I Q H L S D V G T T F N L I L M P E K P I S F T F W P F N Q E A T Q Q

### Case 3

M L A K G L P P R S V L V K G C Q T F L S A P R E G L G R L R V P T G E G A G I  
S T R S P R P F N E I P S P G D N G W L N L Y H F W R E T G T H K V H L H H V Q  
N F Q K Y G P I Y R E K L G N V E S V Y V I D P E D V A L L F K S E G P N P E

### Case 4

M L A K G L P P R S V L V K G C Q T F L S A P R E G L G R L R V P T G E G A G I  
S T R S P R P F N E I P S P G D N G W L N L Y H F W R E T G T H K V H L H H V Q  
N F Q K Y G P I Y R E K L G N V E S V Y V S T L K M W P F S L S P R A Q P R T I  
P H P A L G R L S P V L P E T H R S P V E E V G S L E E R P G G P E P G G D G S  
R G H Q E L F A P V G C S V S G L R Q C P A Q A H Q E G G L R K L L G G H Q

#### Case 5

M L A K G L P P R S V L V K G C Q T F L S A P R E G L G R L R V P T G E G A G I  
S T R S P R P F N E I P S P G D N G W L N L Y H F W R E T G T H K V H L H H V Q  
N F Q K Y G P I Y R E K L G N V E S V Y V I D P E D V A L L F K S E G P N P E R  
F L I P P W V A Y P P V L P E T H R S P V E E V G S L E E R P G G P E P G G D G  
S R G H Q E L F A P V G C S V S G L R Q C P A Q A H Q E G G L R K L L G G H Q

#### Case 6

M L A K G L P P R S V L V K G C Q T F L S A P R E G L G R L R V P T G E G A G I  
S T R S P R P F N E I P S P G D N G W L N L Y H F W R E T G T H K V H L H H V Q  
N F Q K Y G P I Y R E K L G N V E S V Y V I D P E D V A L L F K S E G P N P E R  
F L I P P W V A Y H Q Y Y Q R P I G V L L K K

#### Case 7

M L A K G L P P R S V L V K G C Q T F L S A P R E G L G R L R V P T G E G A G I  
S T R S P R P F N E I P S P G D N G W L N L Y H F W R E T G T H K V H L H H V Q  
N F Q K Y G P I Y R E K L G N V E S V Y V I D P E D V A L L F K S E G P N P E R  
F L I P P W V A Y H Q Y Y Q R P I G V L L K K S A A W K K D R V A L N Q E V M A  
P E A T K N F L P L L D A C L G T S S V S C T G A S R R R A P E I T R G T S  
V Met T C S A L P L S P S L T S F L G S A R G C W R K

#### Case 8

M L A K G L P P R S V L V K G C Q T F L S A P R E G L G R L R V P T G E G A G I  
S T R S P R P F N E I P S P G D N G W L N L Y H F W R E T G T H K V H L H H V Q  
N F Q K Y G P I Y R E K L G N V E S V Y V I D P E D V A L L F K S E G P N P E R  
F L I P P W V A Y H Q Y Y Q R P I G V L L K K S A A W K K D R V A L N Q E V M A  
P E A T K N F L P R W M Q C L G T S S V S C T G A S R R R A P E I T R G T S  
V Met T C S A L P L S P S L T S F L G S A R G C W R K

### Case 9

M L A K G L P P R S V L V K G C Q T F L S A P R E G L G R L R V P T G E G A G I  
S T R S P R P F N E I P S P G D N G W L N L Y H F W R E T G T H K V H L H H V Q  
N F Q K Y G P I Y R E K L G N V E S V Y V I D P E D V A L L F K S E G P N P E R  
F L I P P W V A Y H Q Y Y Q R P I G V L L K K S A A W K K D R V A L N Q E V M A  
P E A T K N F L P L L D A V S R D F V S V L H R R I K K A G S G N Y S G D I S D  
D L F R F A F E S I T N V I F G E R Q G M L E E V V N P E V Q R F I D A V Y Q M F  
H T S V P M P N L P P D L F R L L R T K A W K D H V S V W D V I F S K A D I Y T  
Q N S Y R E L R Q K G S V H H D S R G I L Y R L L G D S K M S F E D I K A N V T  
E Met V E G G V G M M S T T L Q W H L F K M A R N L K V Q D M L R A E V L A A R  
H Q A Q G D M A T M L R L V P L L K A S I K E T L R L H P I S V T L Q R Y L V N  
D L V L R D Y M I P A K T L V Q V A I Y A L G R E P T F F F D P E N F D P T R W  
L S K D K N I T Y F R N L G F G W G V R Q C L G R R I A E L E M T I F L I N Met L  
E N F R V E I Q H L S D V G T T F N L I L M P E K P I S F T F W P F N Q E A T Q  
Q

### Case 10

M L A K G L P P R S V L V K G C Q T F L S A P R E G L G R L R V P T G E G A G I  
S T R S P R P F N E I P S P G D N G W L N L Y H F W R E T G T H K V H L H H V Q  
N F Q K Y G P I Y R E K L G N V E S V Y V I D P E D V A L L F K S E G P N P E R  
F L I P P W V A Y H Q Y Y Q R P I G V L L K K S A A W K K D R V A L N Q E V M A

P E A T K N F L P L L D A V S R D F V S V L H R R I K K A G S G N Y S G D I S D  
D L F R F A F E S I T N V I F G E R Q G M L E E V V N P E A Q

### Case 11

M L A K G L P P R S V L V K G C Q T F L S A P R E G L G R L R V P T G E G A G I  
S T R S P R P F N E I P S P G D N G W L N L Y H F W R E T G T H K V H L H H V Q  
N F Q K Y G P I Y R E K L G N V E S V Y V I D P E D V A L L F K S E G P N P E R  
F L I P P W V A Y H Q Y Y Q R P I G V L L K K S A A W K K D R V A L N Q E V M A  
P E A T K N F L P L L D A V S R D F V S V L H R R I K K A G S G N Y S G D I S D  
D L F R F A F E S I T N V I F G E R Q G M L E E V V N P E A Q R F I D A I Y Q M F  
H T S V P M L N L P P D L F R L F R T K T W K D H V A A W D V I F S K A D I Y T

### Case 12

M L A K G L P P R S V L V K G C Q T F L S A P R E G L G R L R V P T G E G A G I  
S T R S P R P F N E I P S P G D N G W L N L Y H F W R E T G T H K V H L H H V Q  
N F Q K Y G P I Y R E K L G N V E S V Y V I D P E D V A L L F K S E G P N P E R  
F L I P P W V A Y H Q Y Y Q R P I G V L L K K S A A W K K D R V A L N Q E V M A  
P E A T K N F L P L L D A V S R D F V S V L H R R I K K A G S G N Y S G D I S D  
D L F R F A F E S I T N V I F G E R Q G M L E E V V N P E A Q R F I D A I Y Q M F  
H T S V P M L N L P P D L F R L F R T K T W K D H V A A W D V I F S K A D Y T P  
R T S T G N

### Case 13

M L A K G L P P R S V L V K G C Q T F L S A P R E G L G R L R V P T G E G A G I  
S T R S P R P F N E I P S P G D N G W L N L Y H F W R E T G T H K V H L H H V Q  
N F Q K Y G P I Y R E K L G N V E S V Y V I D P E D V A L L F K S E G P N P E R  
F L I P P W V A Y H Q Y Y Q R P I G V L L K K S A A W K K D R V A L N Q E V M A  
P E A T K N F L P L L D A V S R D F V S V L H R R I K K A G S G N Y S G D I S D

D L F R F A F E S I T N V I F G E R Q G M L E E V V N P E A Q R F I D A I Y Q M F  
H T S V P M L N L P P D L F R L F R T K T W K D H V A A W D V I F S K A D I Y T  
Q N F Y W E L R Q K G S V H H D Y R G I L Y R L L G D S K M S F R T S R P T S Q  
R C W Q E G G H D V H D P A V A L V

#### Case 14

M L A K G L P P R S V L V K G C Q T F L S A P R E G L G R L R V P T G E G A G I  
S T R S P R P F N E I P S P G D N G W L N L Y H F W R E T G T H K V H L H H V Q  
N F Q K Y G P I Y R E K L G N V E S V Y V I D P E D V A L L F K S E G P N P E R  
F L I P P W V A Y H Q Y Y Q R P I G V L L K K S A A W K K D R V A L N Q E V M A  
P E A T K N F L P L L D A V S R D F V S V L H R R I K K A G S G N Y S G D I S D  
D L F R F A F E S I T N V I F G E R Q G M L E E V V N P E A Q R F I D A I Y Q M F  
H T S V P M L N L P P D L F R L F R T K T W K D H V A A W D V I F S K A D I Y T  
Q N F Y W E L R Q K G S V H H D Y R G I L Y R L L G D S K M S F E D I K A N V T  
E M L A G G V D T T S M T L Q W H L Y E M A R N L K V Q D M L R A E V L A A R H  
Q A Q G D M A T M L Q L V P L L K A S I K E T L R L Y P I P V T L K R Y V L N D  
L F I R H Y M T P T K T L V E V A I C A L G R E P T F F F D P E N F D S T R W L  
S K D K N I T Y F R N L G F G W G V R Q C P G R R I T E L E V T V F L I N L L E  
N F R I E I Q H L S D E G T T F N L I L T L E K P I S F T F W S L I Q E A T Q Q

#### Case 15

M L A K G L P P R S V L V K G C Q T F L S A P R E G L G R L R V P T G E G A G I  
S T R S P R P F N E I P S P G D N G W L N L Y H F W R E T G T H K V H L H H V Q  
N F Q K Y G P I Y R E K L G N V E S V Y V I D P E D V A L L F K S E G P N P E R  
F L I P P W V A Y H Q Y Y Q R P I G V L L K K S A A W K K D R V A L N Q E V M A  
P E A T K N F L P L L D A V S R D F V S V L H R R I K K A G S G N Y S G D I S D  
D L F R F A F E S I T N V I F G E R Q G M L E E V V N P E A Q R F I D A I Y Q M F  
H T S V P M L N L P P D L F R L F R T K T W K D H V A A W D V I F S K A D I Y T

Q N F Y W E L R Q K G S V H H D Y R G I L Y R L L G D S K M S F E D I K A N V T  
E M L A G G V D T T S M T L Q W H L Y E M A R N L K V Q D M L R A E V L A A R H  
Q A Q G D M A T M L Q L V P L L K A S I K E T L R L H P I S V T L Q R Y L V N D  
L V L

### Case 16

Met L A K G L P P R S V L V K G C Q T F L S A P R E G L G R L R V P T G E G A G  
I S T R S P R P F N E I P S P G D N G W L N L Y H F W R E T G T H K V H L H H V  
Q N F Q K Y G P I Y R E K L G N V E S V Y V I D P E D V A L L F K S E G P N P E  
R F L I P P W V A Y H Q Y Y Q R P I G V L L K K S A A W K K D R V A L N Q E V Met A  
P E A T K N F L P L L D A V S R D F V S V L H R R I K K A G S G N Y S G D I S D  
D L F R F A F E S I T N V I F G E R Q G Met L E E V V N P E A Q R F I D A I Y  
Q Met F H T S V P Met L N L P P D L F R L F R T K T W K D H V A A W D V I F S K  
A D I Y T Q N F Y W E L R Q K G S V H H D Y R G I L Y R L L G D S K Met S F E D  
I K A N V T E Met L A G G V D T T S Met T L Q W H L Y E Met A R N L K V Q D Met L  
R A E V L A A R H Q A Q G D Met A T Met L Q L V P L L K A S I K E T L R L H P I  
S V T L Q R Y L V N D L V L R D Y Met I P A K T L V Q V A I Y A L G

### Case 17

Met L A K G L P P R S V L V K G C Q T F L S A P R E G L G R L R V P T G E G A G  
I S T R S P R P F N E I P S P G D N G W L N L Y H F W R E T G T H K V H L H H V  
Q N F Q K Y G P I Y R E K L G N V E S V Y V I D P E D V A L L F K S E G P N P E  
R F L I P P W V A Y H Q Y Y Q R P I G V L L K K S A A W K K D R V A L N Q E V Met A  
P E A T K N F L P L L D A V S R D F V S V L H R R I K K A G S G N Y S G D I S D  
D L F R F A F E S I T N V I F G E R Q G Met L E E V V N P E A Q R F I D A I Y  
Q Met F H T S V P Met L N L P P D L F R L F R T K T W K D H V A A W D V I F S K  
A D I Y T Q N F Y W E L R Q K G S V H H D Y R G I L Y R L L G D S K Met S F E D  
I K A N V T E Met L A G G V D T T S Met T L Q W H L Y E Met A R N L K V Q D Met L

R A E V L A A R H Q A Q G D Met A T Met L Q L V P L L K A S I K E T L R L H P I  
S V T L Q R Y L V N D L V L R D Y Met I P A K T L V Q V A I Y A L G R E P T F F  
F D P E N F D P T Stop

### Case 18

Met L A K G L P P R S V L V K G C Q T F L S A P R E G L G R L R V P T G E G A G  
I S T R S P R P F N E I P S P G D N G W L N L Y H F W R E T G T H K V H L H H V  
Q N F Q K Y G P I Y R E K L G N V E S V Y V I D P E D V A L L F K S E G P N P E  
R F L I P P W V A Y H Q Y Y Q R P I G V L L K K S A A W K K D R V A L N Q E V Met A  
P E A T K N F L P L L D A V S R D F V S V L H R R I K K A G S G N Y S G D I S D  
D L F R F A F E S I T N V I F G E R Q G Met L E E V V N P E A Q R F I D A I Y  
Q Met F H T S V P Met L N L P P D L F R L F R T K T W K D H V A A W D V I F S K  
A D I Y T Q N F Y W E L R Q K G S V H H D Y R G I L Y R L L G D S K Met S F E D  
I K A N V T E Met L A G G V D T T S Met T L Q W H L Y E Met A R N L K V Q D Met L  
R A E V L A A R H Q A Q G D Met A T Met L Q L V P L L K A S I K E T L R L H P I  
S V T L Q R Y L V N D L V L R D Y Met I P A K T L V Q V A I Y A L G R E P T F F  
F D P E N F D P T R W L S K D K N I T Y F R N L G F G W G V R Q C L G R R I A E  
L E Met T I F L I N Met L E N F R V E I Q H L S D V G T T F N L I L Met P E K P  
I S F T F W P F N Q E A T Q Stop

### Case 19

Met L A K G L P P R S V L V K G C Q T F L S A P R E G L G R L R V P T G E G A G I  
S T R S P R P F N E I P S P G D N G W L N L Y H F W R E T G T H K V H L H H V Q  
N F Q K Y G P I Y R E K L G N V E S V Y V I D P E D V A L L F K S E G P N P E R  
F L I P P W V A Y H Q Y Y Q R P I G V L L K K S A A W K K D R V A L N Q E V Met A  
P E A T K N F L P L L D A V S R D F V S V L H R R I K K A G S G N Y S G D I S D  
D L F R F A F E S I T N V I F G E R Q G Met L E E V V N P E A Q R F I D A I Y  
Q Met F H T S V P Met L N L P P D L F R L F R T K T W K D H V A A W D V I F S K A

D I Y T Q N F Y W E L R Q K G S V H H D Y R G I L Y R L L G D S K Met S F E D I K  
 A N V T E Met L A G G V D T T S Met T L Q W H L Y E Met A R N L K V Q D Met L R A E  
 V L A A R H Q A Q G D Met A T Met L Q L V P L L K A S I K E T L R L H P I S V T L  
 Q R Y L V N D L V L R D Y Met I P A K T L V Q V A I Y A L G R E P T F F F D P E N  
 F D P T R W L S K D K N I T Y F R N L G F G W G V R Q C L G R R I A E L E Met T I  
 F L I N Met L E N F R V E I Q H L S D V G T T F N L I L Met P E K P I S F T F W P  
 F N Q E A T Q Q R

### Case 20

Met L A K G L P P R S V L V K G C Q T F L S A P R E G L G R L R V P T G E G A G  
 I S T R S P R P F N E I P S P G D N G W L N L Y H F W R E T G T H K V H L H H V  
 Q N F Q K Y G P I Y R E K L G N V E S V Y V I D P E D V A L L F K S E G P N P E  
 R F L I P P W V A Y H Q Y Y Q R P I G V L L K K S A A W K K D R V A L N Q E V Met A  
 P E A T K N F L P L L D A V S R D F V S V L H R R I K K A G S G N Y S G D I S D  
 D L F R F A F E S I T N V I F G E R Q G Met L E E V V N P E A Q R F I D A I Y  
 Q Met F H T S V P Met L N L P P D L F R L F R T K T W K D H V A A W D V I F S K  
 A D I Y T Q N F Y W E L R Q K G S V H H D Y R G I L Y R L L G D S K Met S F E D  
 I K A N V T E Met L A G G V D T T S Met T L Q W H L Y E Met A R N L K V Q D Met L  
 R A E V L A A R H Q A Q G D Met A T Met L Q L V P L L K A S I K E T L R L H P I  
 S V T L Q R Y L V N D L V L R D Y Met I P A K T L V Q V A I Y A L G R E P T F F  
 F D P E N F D P T R W L S K D K N I T Y F R N L G F G W G V R Q C L G R R I A E  
 L E Met T I F L I N Met L E N F R V E I **Stop**

### Case 21

Met L A K G L P P R S V L V K G C Q T F L S A P R E G L G R L R V P T G E G A G  
 I S T R S P R P F N E I P S P G D N G W L N L Y H F W R E T G T H K V H L H H V  
 Q N F Q K Y G P I Y R E K L G N V E S V Y V I D P E D V A L L F K S E G P N P E



R F L I P P W V A Y H Q Y Y Q R P I G V L L K K S A A W K K D R V A L N Q E V Met A  
P E A T K N F L P L L D A V S R D F V S V L H R R I K K A G S G N Y S G D I S D  
D L F R F A F E S I T N V I F G E R Q G Met L E E V V N P E A Q R F I D A I Y  
Q Met F H T S V P Met L N L P P D L F R L F R T K T W K D H V A A W D V I F S K  
A D I Y T Q N F Y W E L R Q K G S V H H D Y R G I L Y R L L G D S K Met S F E D  
I K A N V T E Met L A G G V D T T S Met T L Q W H L Y E Met A R N L K V Q D Met L  
R A E V L A A R H Q A Q G D Met A T Met L Q L V P L L K A S I K E T L R L H P I  
S V T L Q R Y L V N D L V L R D Y Met I P A K T L V Q V A I Y A L G R E P T F F  
F D P E N F D P T R W L S K D K N I T Y F R N L G F G W G V R Q C L G R R I A E  
L E Met T I F L I N Met L E N F R V E I Q H L S D V G T T F N L I L Met P E K P  
I S F T F W P F N Stop

## Case 22

Met L A K G L P P R S V L V K G C Q T F L S A P R E G L G R L R V P T G E G A G  
I S T R S P R P F N E I P S P G D N G W L N L Y H F W R E T G T H K V H L H H V  
Q N F Q K Y G P I Y R E K L G N V E S V Y V I D P E D V A L L F K S E G P N P E  
R F L I P P W V A Y H Q Y Y Q R P I G V L L K K S A A W K K D R V A L N Q E V Met A  
P E A T K N F L P L L D A V S R D F V S V L H R R I K K A G S G N Y S G D I S D  
D L F R F A F E S I T N V I F G E R Q G Met L E E V V N P E A Q R F I D A I Y  
Q Met F H T S V P Met L N L P P D L F R L F R T K T W K D H V A A W D V I F S K  
A D I Y T Q N F Y W E L R Q K G S V H H D Y R G I L Y R L L G D S K Met S F E D  
I K A N V T E Met L A G G V D T T S Met T L Q W H L Y E Met A R N L K V Q D Met L  
R A E V L A A R H Q A Q G D Met A T Met L Q L V P L L K A S I K E T L R L H P I  
S V T L Q R Y L V N D L V L R D Y Met I P A K T L V Q V A I Y A L G R E P T F F  
F D P E N F D P T R W L S K D K N I T Y F R N L G F G W G V R Q C L G R R I A E  
L E Met T I F L I N Met L E N F R V E I Q H L S D V G T T F N L I L Met P E K P  
I S F T F W P F N Q

**Figure S1:** Protein sequences of mutated proteins retrieved through Expasy tool for cases 1-22, containing variations documented in present study

### Molecular Function

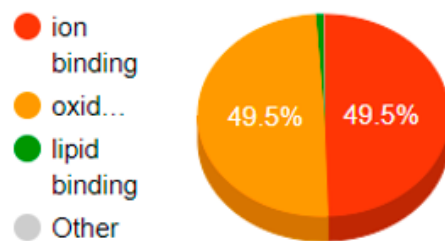

### Biological Process

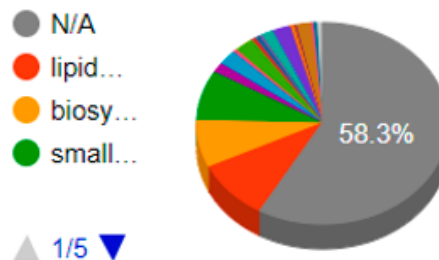

### Cellular Component

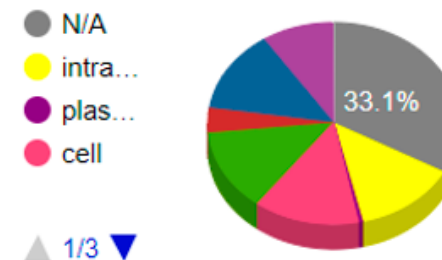

## Case 17

### Molecular Function

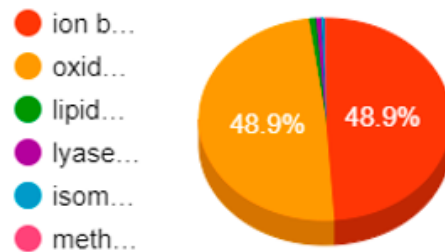

### Biological Process

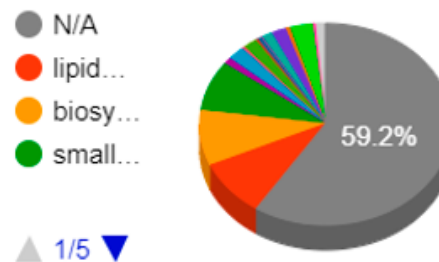

### Cellular Component

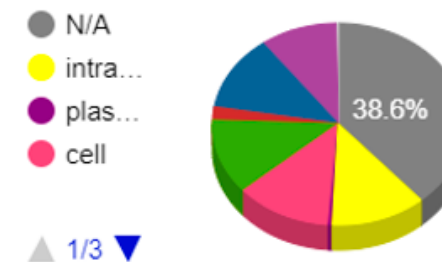

## Case 18

### Molecular Function

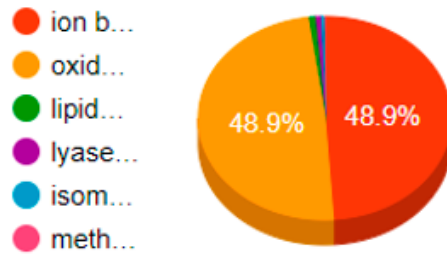

### Biological Process

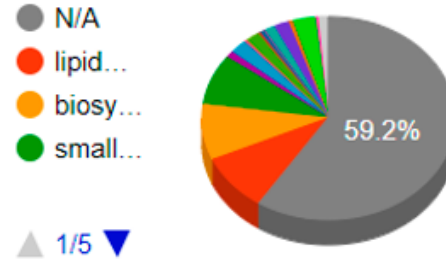

### Cellular Component

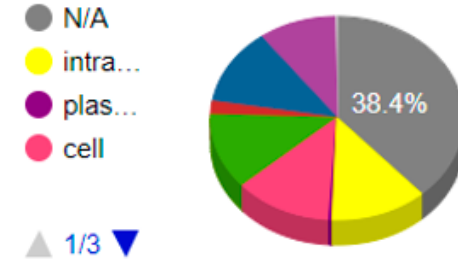

## Case 19

### Molecular Function

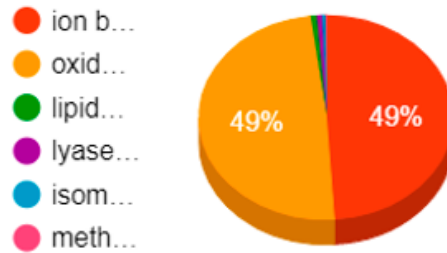

### Biological Process

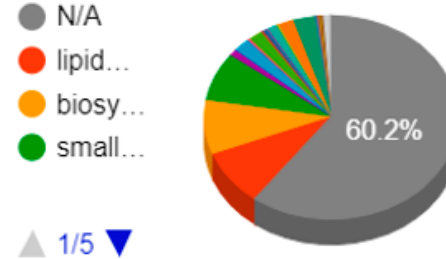

### Cellular Component

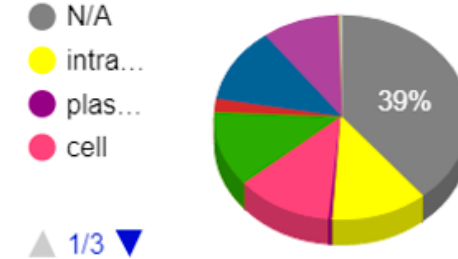

## Case 20

### Molecular Function

- ion b...
- oxid...
- lipid...
- lyase...
- isom...
- meth...

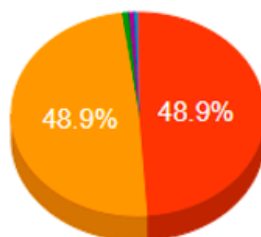

### Biological Process

- N/A
- lipid...
- biosy...
- small...

▲ 1/5 ▼

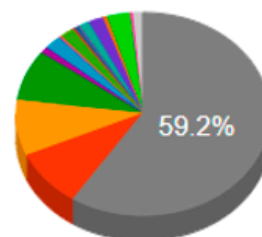

### Cellular Component

- N/A
- intra...
- plas...
- cell

▲ 1/3 ▼

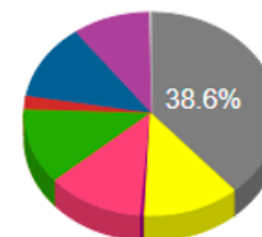

## Case 21

### Molecular Function

- ion b...
- oxid...
- lipid...
- lyase...
- isom...
- meth...

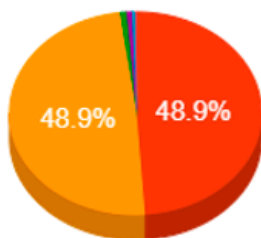

### Biological Process

- N/A
- lipid...
- biosy...
- small...

▲ 1/5 ▼

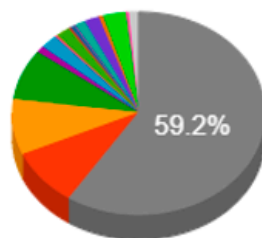

### Cellular Component

- N/A
- intra...
- plas...
- cell

▲ 1/3 ▼

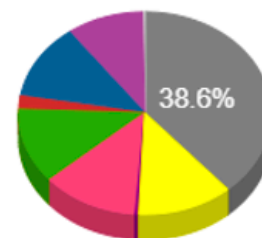

## Case 22

**Figure S2:** Effect of SNPs documented in cases 17-22 on the ontology of mutated proteins

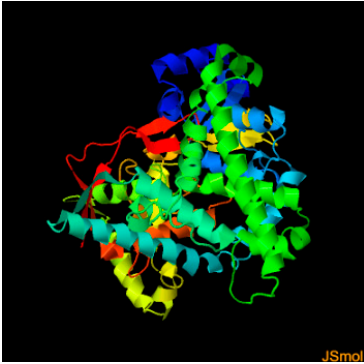

Case 2

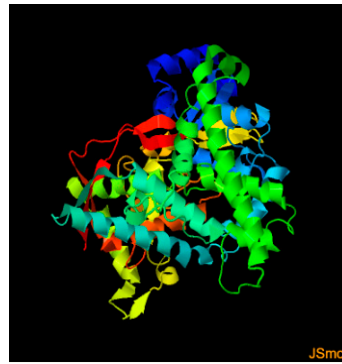

Case 9

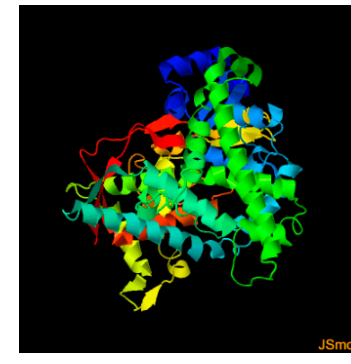

Case 14

**Figure S3:** Effect of SNPs documented in cases 2, 9 and 14 on 3D structure of mutated proteins

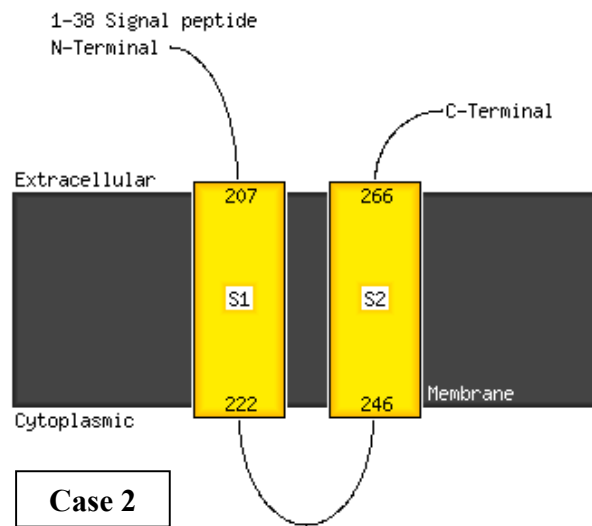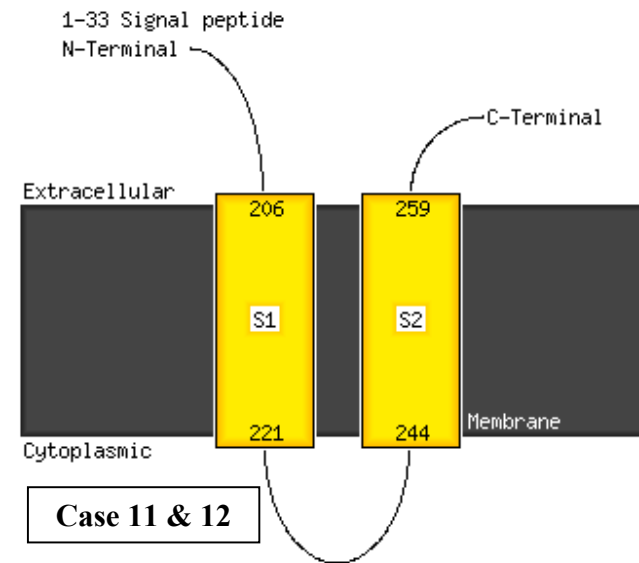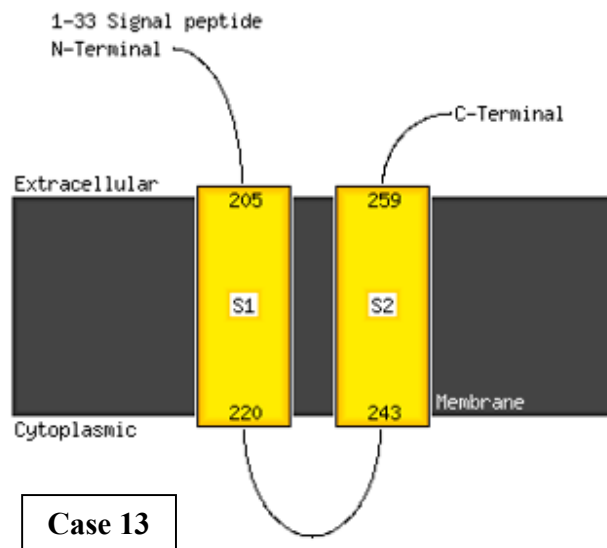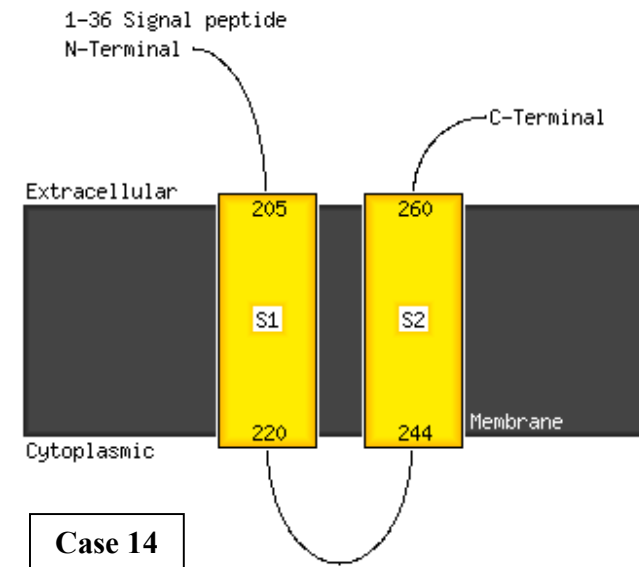

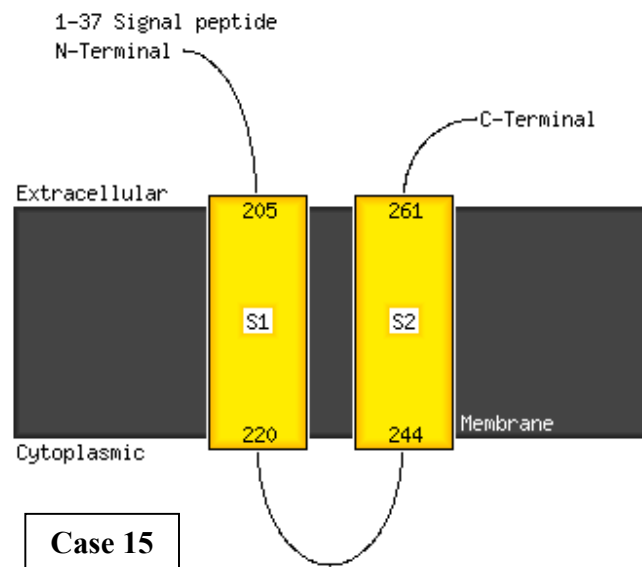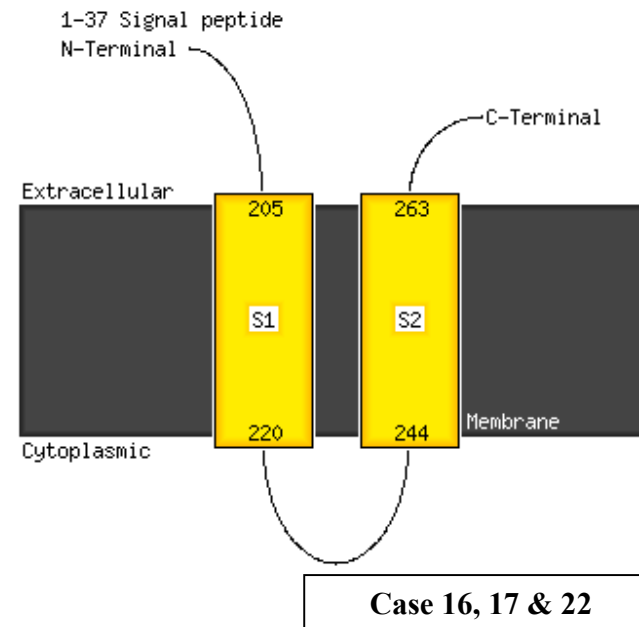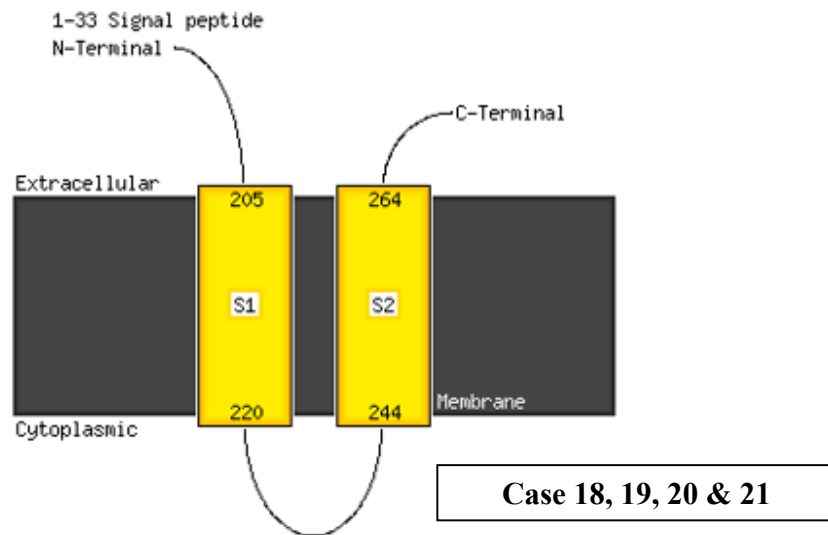



**Figure S4:** Effect of SNPs documented in cases 2 and 11-22 on the topology of mutated proteins

**Table S1:** Variations in 2D structure of mutated proteins induced by SNPs documented in present study

| <b>Case ID</b> | <b>Disorder (%)</b> | <b>Alpha helix (%)</b> | <b>Beta strand (%)</b> |
|----------------|---------------------|------------------------|------------------------|
| <b>Normal</b>  | 22                  | 50                     | 9                      |
| <b>Case 1</b>  | 44                  | 38                     | 6                      |
| <b>Case 2</b>  | 23                  | 51                     | 9                      |
| <b>Case 3</b>  | 41                  | 50                     | 8                      |
| <b>Case 4</b>  | 37                  | 58                     | 5                      |
| <b>Case 5</b>  | 37                  | 50                     | 6                      |
| <b>Case 6</b>  | 34                  | 43                     | 7                      |
| <b>Case 7</b>  | 25                  | 62                     | 4                      |
| <b>Case 8</b>  | 24                  | 63                     | 4                      |
| <b>Case 9</b>  | 22                  | 50                     | 9                      |
| <b>Case 10</b> | 24                  | 58                     | 4                      |
| <b>Case 11</b> | 23                  | 62                     | 3                      |
| <b>Case 12</b> | 22                  | 62                     | 3                      |
| <b>Case 13</b> | 24                  | 63                     | 3                      |

|                |    |    |   |
|----------------|----|----|---|
| <b>Case 14</b> | 22 | 51 | 9 |
| <b>Case 15</b> | 25 | 62 | 4 |
| <b>Case 16</b> | 22 | 57 | 5 |
| <b>Case 17</b> | 21 | 57 | 6 |
| <b>Case 18</b> | 21 | 51 | 9 |
| <b>Case 19</b> | 22 | 50 | 9 |
| <b>Case 20</b> | 22 | 54 | 6 |
| <b>Case 21</b> | 20 | 51 | 9 |
| <b>Case 22</b> | 22 | 51 | 9 |

**Supplementary data Table S2:** Effect of mutations on trans-membrane topology of mutated proteins

| Case # | No. of TM segments | Length of signal peptide | No. of amino acids in TB segments |         |         |
|--------|--------------------|--------------------------|-----------------------------------|---------|---------|
|        |                    |                          | S1                                | S2      | S3      |
| Normal | 2                  | 1-33                     | 205-220                           | 244-263 | ---     |
| 1      | ---                | ---                      | ---                               | ---     | ---     |
| 2      | 2                  | 1-38                     | 207-222                           | 246-266 | ---     |
| 3      | ---                | ---                      | ---                               | ---     | ---     |
| 4      | ---                | ---                      | ---                               | ---     | ---     |
| 5      | ---                | ---                      | ---                               | ---     | ---     |
| 6      | ---                | ---                      | ---                               | ---     | ---     |
| 7      | 1                  | 1-29                     | 202-221                           | ---     | ---     |
| 8      | ---                | ---                      | ---                               | ---     | ---     |
| 9      | 3                  | 1-33                     | 205-220                           | 244-262 | 346-361 |
| 10     | 1                  | 1-28                     | 206-221                           | ---     | ---     |
| 11     | 2                  | 1-33                     | 206-221                           | 244-259 | ---     |
| 12     | 2                  | 1-33                     | 206-221                           | 244-259 | ---     |

|    |   |      |          |         |     |
|----|---|------|----------|---------|-----|
| 13 | 2 | 1-33 | 205-220  | 243-259 | --- |
| 14 | 2 | 1-36 | 205-220  | 244-260 | --- |
| 15 | 2 | 1-37 | 205-220  | 244-261 | --- |
| 16 | 2 | 1-37 | 205--220 | 244-263 | --- |
| 17 | 2 | 1-37 | 205--220 | 244-263 | --- |
| 18 | 2 | 1-33 | 205-220  | 244-264 | --- |
| 19 | 2 | 1-33 | 205-220  | 244-264 | --- |
| 20 | 2 | 1-33 | 205-220  | 244-264 | --- |
| 21 | 2 | 1-33 | 205-220  | 244-264 | --- |
| 22 | 2 | 1-37 | 205--220 | 244-263 | --- |

TM = transmembrane
